# Supplementary material
Source: Springer Nature journal article supplement (https://www.springermedizin.de/resource/supplementary/12889_2014_7463_MOESM5_ESM.pdf/9497570)

**A**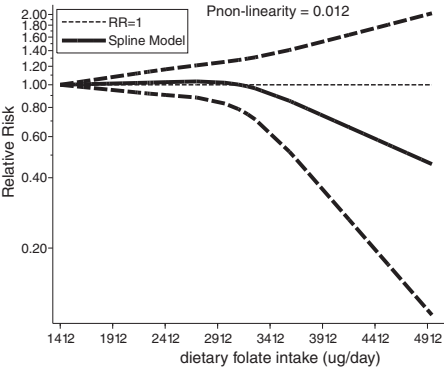**B**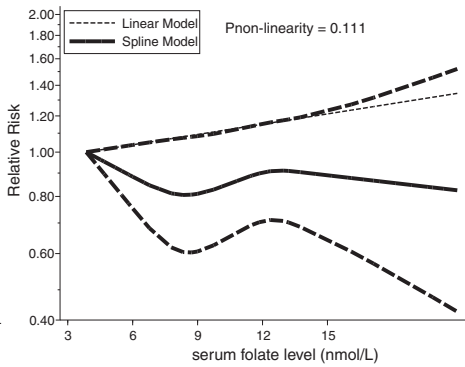

Supplement: MOESM5 [file 9497570]
